# Supplementary material
Source: publisher figshare collection journal article supplement (https://rs.figshare.com/ndownloader/files/13757129)
Supplement: Supplementary file 1 [file 13757129]

**Supplementary information**

**Supplemental Table 1** Primers used in this study

| Note | Primer name | Sequence (5’-3’) |
| --- | --- | --- |
| Yeast Two-Hybrid | A/BD-CP-F | CGCATATGATGGCTGACATAAGACTCGA |
|  | A/BD-CP-R | CGGGATCCTCATCTTGTCACTTTGTTTAGTAC |
|  | AD-muCP-110-F | CGCATATGCTAACGGACAACGACCTGAG |
|  | AD-muCP-240-F | CGCATATGTTTTCGCGTCAAATGTTCGAAC |
|  | AD-muCP-110-R | CGGGATCCTAGGGTCTGAAAAATAGGTTG |
|  | AD-muCP-140-R | CGGGATCCTATTTGTTCAGCATCAAGTTTGGAG |
|  | AD-muCP-240-R | CGGGATCCAAATTGGTCATAACCACCATAG |
|  | AD-muCP-270-R | CGGGATCCTCCCGTTTCAGCTTTAAAAACAG |
|  | A/BD-LsRACK1-F | CGCATATGATGTCGGAAACTTTTGATATGAAG |
|  | A/BD-LsRACK1-R | CGGTCGACTTATCGTGAGACAGCAACCTG |
|  | BD-WD40-179-F | CGCATATGAACTGCCGTCTGAAAATCAAC |
|  | BD-WD40-220-F | CGCATATGAATGATGGCAAACACCTTCAC |
|  | BD-WD40-268-F | CGCATATGCTGAAACCAGAAGTCGTATCTC |
|  | BD-WD40-179-R | CGGAATTCGGTCAAGTTCCAGACCTTGAC |
|  | BD-WD40-268-R | CGGAATTCCAGCTCATCAACCATTTCCTTTG |
| Baculovirus | GFP-CP-F | AATCTAGAATGATGGCTGACATAAGACTCGA |
|  | GFP-CP-R | GTCTCGAGTCTTGTCACTTTGTTTAGTACTATC |
|  | GFP-muCP-240-F | CGGGATCCTTTTCGCGTCAAATGTTCGAAC |
|  | GFP-muCP-270-R | CGGGATCCGCTCCAAGTCTGTTCGAGTAAAG |
|  | GFP-LsRACK1-F | ACGTCGACGATGTCGGAAACTTTTGATATGAAG |
|  | GFP-LsRACK1-R | AATCTAGATCGTGAGACAGCAACCTG |
| Prokaryotic | GST-LsRACK1-F | CGGAATTCCATGTCGGAAACTTTTGATATGAAG |
|  | GST-LsRACK1-R | CGGTCGACTTATCGTGAGACAGCAACCTG |
| RT-PCR | RT-CP-F | CCGACCAACAATCACTCTGT |
|  | RT-CP-R | GGTCAGTTCGTATTCATCGG |
| qRT-PCR | Q-Actin-F | GAGCGTGAAATCGTAAGAGACA |
|  | Q-Actin-R | CAGGAAGGAAGGCTGGAACAG |
|  | Q-CP-F | AGACCCTAACGGACAACGAC |
|  | Q-CP-R | ACCTGGAATTTTGCCAACTATAC |
|  | Q-RACK1-F | CCAACTGCCGTCTGAAAATC |
|  | Q-RACK1-R | TTGTGGTCCAATGTGTGAAG |
| dsRNA | dsRACK1-F | GAATTCTAATACGACTCACTATAGGGAGAGTATTATCTTCTGACGGCAAC |
|  | dsRACK1-R | GAATTCTAATACGACTCACTATAGGGAGAGAGGTAACCTGTGTGTCCAC |
|  | dsGFP-F | GGATCCTAATACGACTCACTATAGGGAGAAAGTTCAGCGTGTCCGGC |
|  | dsGFP-R | GGATCCTAATACGACTCACTATAGGGAGACACCTTGATGCCGTTCTTCTG |

**
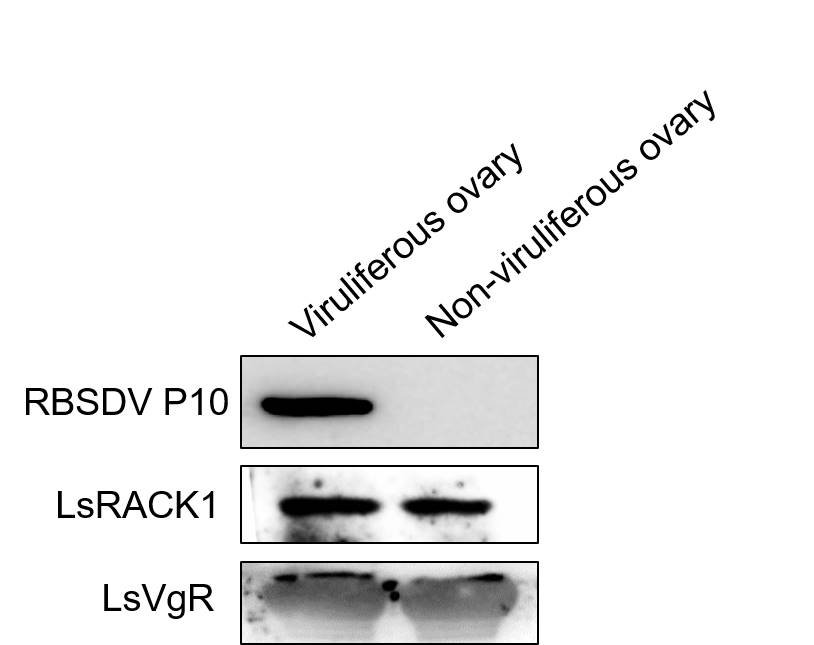
**

**Supplemental Figure 1** Western blot analyses of RBSDV P10 in ovaries dissected from non-viruliferous and viruliferous female SBPHs. Vitellogenin receptor (VgR) has ovarian specificity and used as loading control.
